# Supplementary material for: Impacts of Hypoxia on Osteoclast Formation and Activity: Systematic Review
Source: MDPI journal article supplement (doi:10.3390/ijms221810146), 2021-09-20
Supplement: s1 [file s1]

**Table S3:** Studies on impacts of hypoxia on the differentiation and activity of osteoclasts derived from bone marrow cells *in vitro*

| Study | Author               | Type of Study & Sample                                                                                                                                                                                             | Hypoxic Conditions                                                                                                                                                                                                    | Outcome Parameters                                                                                                                                                                                                  | Findings                                                                                                                                                                                                                                                                                                                                                                                                                                                                            |
|-------|----------------------|--------------------------------------------------------------------------------------------------------------------------------------------------------------------------------------------------------------------|-----------------------------------------------------------------------------------------------------------------------------------------------------------------------------------------------------------------------|---------------------------------------------------------------------------------------------------------------------------------------------------------------------------------------------------------------------|-------------------------------------------------------------------------------------------------------------------------------------------------------------------------------------------------------------------------------------------------------------------------------------------------------------------------------------------------------------------------------------------------------------------------------------------------------------------------------------|
| 1.    | Yu et al. (2020)     | <i>in vitro</i> ; Murine bone-marrow-derived monocytes (BMMs) flushed from 3 w.o. C57BL/6 mice, grown until 5 days and were cultured with M-CSF and RANKL                                                          | 2% O <sub>2</sub>                                                                                                                                                                                                     | a. Osteoclast was detected by TRAP staining.<br>b. Resorption was measured on Corning Osteo Assay Surface plates using Image J.<br>c. NFATc1, cathepsin K (CatK), c-Fos protein expression through Western blotting | a. Hypoxia increased TRAP positive osteoclasts.<br>b. Total resorption area was higher under hypoxic conditions.<br>c. Hypoxia increased the protein expression of NFATc1, CatK and c-Fos.                                                                                                                                                                                                                                                                                          |
| 2.    | Ma et al. (2018)     | <i>in vitro</i> ; Murine BMMs were obtained from the tibiae of 6-8 w.o C57BL/6 mice, were cultured with M-CSF and RANKL supplementation for 3 days before hypoxia treatment (for outcome parameter TRAP staining). | 1% O <sub>2</sub> for 7 days for TRAP staining.<br>For the resorption assay, 1% O <sub>2</sub> for 15 days                                                                                                            | a. Osteoclasts were identified by TRAP staining.<br>b. Resorption was measured by toluidine blue staining.<br>c. Gene expression of TRAP RANK, CatK, TRAP, and NFATc1 was measured by RT-qPCR.                      | a. Number of TRAP-positive multinucleated cells was lower in 1 % O <sub>2</sub> for both cell types.<br>b. The size of multinucleated cells was smaller in cultures under 1 % O <sub>2</sub> for both cell types.<br>c. Resorption area was smaller in cultures under 1% O <sub>2</sub><br>d. The mRNA expression of RANK, CatK, TRAP, and NFATc1 was lower in cultures under 1% O <sub>2</sub><br>e. The mRNA of NFATc1 is lower in hypoxia 1% O <sub>2</sub> for both cell types. |
| 3.    | Nomura et al. (2015) | <i>in vitro</i> ; Human bone marrow cells (BMCs) from donors who underwent total hip arthroplasty for osteoarthritis were cultured with M-CSF and RANKL supplementation.                                           | Hypoxia: 10, 5, 3 or 1% O <sub>2</sub> for 21 days.<br>Time course approaches:<br>a. Day 1 to 21 - Normoxia<br>b. Day1 to 7 days - Normoxia + 14 days - 5% O <sub>2</sub><br>c. Day1 to 14 days - Normoxia + 7 days - | a. Osteoclasts were identified by TRAP staining.                                                                                                                                                                    | a. Number of TRAP-positive multinucleated osteoclast cells formed was not significantly more under 1% O <sub>2</sub> hypoxia. 3-10% O <sub>2</sub> increased number of TRAP-positive cells<br>b. Hypoxic (5% O <sub>2</sub> ) exposure during the early and longer culture time points enhanced differentiation of BMCs into OCs                                                                                                                                                    |

|  |  |  |                                                                                                                                                                              |  |                                                                                                                                                                                                                      |
|--|--|--|------------------------------------------------------------------------------------------------------------------------------------------------------------------------------|--|----------------------------------------------------------------------------------------------------------------------------------------------------------------------------------------------------------------------|
|  |  |  | 5% O <sub>2</sub><br>d. Day1 to 7 days - 5% O <sub>2</sub> + 14 days - Normoxia<br>e. Day1 to 14 - 5% O <sub>2</sub> + 7 days - Normoxia<br>f. 5% O <sub>2</sub> for 21 days |  | c. Hypoxic (5% O <sub>2</sub> ) exposure during the early and longer culture time points increased the number of pre-osteoclasts and facilitated differentiation of pre-osteoclasts into multinucleated osteoclasts. |
|--|--|--|------------------------------------------------------------------------------------------------------------------------------------------------------------------------------|--|----------------------------------------------------------------------------------------------------------------------------------------------------------------------------------------------------------------------|

|    |                              |                                                                                                                                                                              |                                                    |                                                                                                            |                                                                                                                                                                                          |
|----|------------------------------|------------------------------------------------------------------------------------------------------------------------------------------------------------------------------|----------------------------------------------------|------------------------------------------------------------------------------------------------------------|------------------------------------------------------------------------------------------------------------------------------------------------------------------------------------------|
| 4. | Fukuoka <i>et al.</i> (2005) | <i>in vitro</i> ; Murine bone marrow cells (BMCs) were obtained from the tibiae of adult ddY mice aged 5-7 weeks old and were cultured with M-CSF and RANKL supplementation. | Hypoxia: 10, 5, 1 or 0% O <sub>2</sub> for 6 days. | a. Osteoclasts were identified by TRAP staining.                                                           | a. Number of TRAP-positive multinucleated cells TRAP-positive multinucleated cells was higher under 5 and 1% O <sub>2</sub>                                                              |
| 5. | Arnett <i>et al.</i> (2003)  | <i>in vitro</i> ; Murine bone marrow cells (BMCs) were derived from long bone of 8 weeks old MF1 mice and were cultured with M-CSF and RANKL supplementation.                | 12, 5 and 2% O <sub>2</sub> for 7 days.            | a. Osteoclasts were identified by TRAP staining.<br>b. Resorption was measured by toluidine blue staining. | a. Number of TRAP-positive multinucleated cells was higher in cultures under 5 and 2 % O <sub>2</sub> .<br>b. Resorption area was bigger in cultures under 12, 5 and 2% O <sub>2</sub> . |
|    |                              |                                                                                                                                                                              | 12, 5, 2, 1 and 0.2% O <sub>2</sub> for 13 days    |                                                                                                            | a. Number of TRAP-positive multinucleated cells and the resorption area were higher in cultures under 5, 2, 1 and 0.2% O <sub>2</sub> .                                                  |
|    |                              | <i>in vivo</i> ; Mature rat osteoclasts                                                                                                                                      | 12, 5, 2, 1 and 0.2% O <sub>2</sub> for 26 h.      |                                                                                                            | a. Number of TRAP-positive multinucleated cells was lower in                                                                                                                             |

|  |  |                                                                                     |  |  |                                                                                                                               |
|--|--|-------------------------------------------------------------------------------------|--|--|-------------------------------------------------------------------------------------------------------------------------------|
|  |  | were isolated from minced long bones of neonatal Sprague Dawley rats of 2 days old. |  |  | <p>cultures under 2, 1 and 0.2% O<sub>2</sub>.</p> <p>b. Resorption area was bigger in cultures under 0.2% O<sub>2</sub>.</p> |
|--|--|-------------------------------------------------------------------------------------|--|--|-------------------------------------------------------------------------------------------------------------------------------|

Note: Normoxia or reoxygenation: 20-21% O<sub>2</sub>. Abbreviations: Oxygen (O<sub>2</sub>), Quantitative reverse transcriptase polymerase chain reaction (RT-qPCR), Tartrate-resistant acid phosphatase (TRAP), Integrin subunit beta-3 (ITGB3), Cathepsin K (CatK), Carboxy-terminal cross-linked telopeptide of type 1 collagen (CTX-1), Matrix metalloproteinase 9 (MMP9), Nuclear factor of activated T cell 1 (NFATc1), Receptor activator of NF- $\kappa$ B ligand (RANKL)
