# Supplementary material for: Impacts of Hypoxia on Osteoclast Formation and Activity: Systematic Review
Source: MDPI journal article supplement (doi:10.3390/ijms221810146), 2021-09-20
Supplement: s1 [file s1]

**Table S4:** Summary of studies on impacts of hypoxia on osteoclast formation and activity *in vivo*

| Study | Author                        | Type of Study & Sample                                                                                                        | Hypoxic Conditions                                                                                                                                                                                                                                                                                                                      | Methods                                                                                                                                                                | Findings                                                                                                                                                                                  |
|-------|-------------------------------|-------------------------------------------------------------------------------------------------------------------------------|-----------------------------------------------------------------------------------------------------------------------------------------------------------------------------------------------------------------------------------------------------------------------------------------------------------------------------------------|------------------------------------------------------------------------------------------------------------------------------------------------------------------------|-------------------------------------------------------------------------------------------------------------------------------------------------------------------------------------------|
| 1.    | Durand et al. (2019)          | <i>in vivo</i> ;<br>10-week-old male C57BL/6J mice                                                                            | 4 days of hypobaric hypoxia<br>FiO <sub>2</sub> = 10%                                                                                                                                                                                                                                                                                   | a. Osteoclast number/bone surface (Oc. N/ BS) was measured by bone static histomorphometry.                                                                            | a. Hypoxia drastically increased Oc.N/ BS by 2 fold.<br>b. Hypoxia did not affect bone volume (BV/TV)                                                                                     |
| 2.    | Takemori et al. (2018)        | <i>in vivo</i> ;<br>5 w.o. female BALB/c mice in which cell line was intramedullary implanted into proximal epiphysis         | CO <sub>2</sub> hydrogel was applied at the tissue where the cells were implanted 4 weeks before.                                                                                                                                                                                                                                       | a. Osteoclast number on CO <sub>2</sub> treated tibiae was detected by tartate-resistant acid phosphatase (TRAP) staining.<br>b. Micro-CT for bone volume              | a. Transcutaneous application of CO <sub>2</sub> hydrogel decreased TRAP-positive cells on treated tibiae.                                                                                |
| 3.    | Wang et al. (2016)            | <i>in vivo</i> ;<br>Normal or ovariectomized (OVX) adult female Sprague Dawley rats of 12 weeks old                           | Intermittent hypobaric hypoxia was induced at 4 weeks after ovariectomy procedure. Hypoxic condition was performed using experimental high-altitude imitation: rats were housed in a chamber with reduced pressure equivalent to an altitude of 5000 m ( $P_B=404$ mmHg; $P_{O_2}=84$ mmHg) for 4 h once daily for 14 consecutive days. | a. Serum level of C-telopeptide of collagen (CTX) as bone resorption marker was measured by ELISA.<br>b. Osteoclasts in the femur were identified using TRAP staining. | a. Osteoclast number and serum CTX-I level were higher in OVX rats that were exposed to intermittent hypobaric hypoxia.<br>b. No change in between normal rats under hypoxia or normoxia. |
| 4.    | Dalle Carbonare et al. (2015) | <i>in vivo</i> ;<br>Humanized mouse model for sickle cell disease (SCD: $Hba^{tm1(HBA)Tow} Hbb^{tm2(HB G1,HBB^*)Tow}$ SS) and | Hypoxia/reoxygenation (H/R) stress: hypoxia (8% O <sub>2</sub> for 10 h) followed by reoxygenation for 3 h                                                                                                                                                                                                                              | a. mRNA level of RANK in tibia bones was determined using RT-qPCR.<br>b. Osteoclast number/tissue area (N.Oc/TA) and erosion surface/bone surface (ES/BS)              | a. mRNA level of RANK in bone was higher in both healthy and SCD mice under H/R stress compared with normoxia. N.Oc/TA, ES/BS and serum CTX levels were higher only in SCD mice           |

|  |  |                                                                                                                                             |  |                                                                                              |                   |
|--|--|---------------------------------------------------------------------------------------------------------------------------------------------|--|----------------------------------------------------------------------------------------------|-------------------|
|  |  | healthy control<br><i>(Hba<sup>tm1(HBA)Tow</sup> Hbb<sup>tm3(H</sup></i><br><i>BC1,HBB)Tow</i> AA) aged<br>16-18 weeks, male<br>and female. |  | were measured by bone<br>histomorphometry.<br>c. Serum CTX-1 level was<br>measured by ELISA. | under H/R stress. |
|--|--|---------------------------------------------------------------------------------------------------------------------------------------------|--|----------------------------------------------------------------------------------------------|-------------------|

Note: Normoxia or reoxygenation: 20-21% O<sub>2</sub>. Terms & Abbreviations: Oxygen (O<sub>2</sub>), Quantitative reverse transcriptase polymerase chain reaction (RT-qPCR), messenger RNA (mRNA), Enzyme linked immunosorbent assay (ELISA), Number of osteoclasts over Total bone area (N.Oc/TA), Erosion surface over bone surface (ES/BS), Tartrate-resistant acid phosphatase (TRAP) & Carboxy-terminal cross-linked telopeptide of type 1 collagen (CTX-1).
