# Supplementary material for: Impacts of Hypoxia on Osteoclast Formation and Activity: Systematic Review
Source: MDPI journal article supplement (doi:10.3390/ijms221810146), 2021-09-20
Supplement: s1 [file s1]

**Table S1:** Studies on impacts of hypoxia on the differentiation and activity of PBMC-derived osteoclasts and osteoclast-like giant cells

| Study | Author                        | Type of Study & Sample                                                                                                                                                | Hypoxic Conditions                                                   | Methods                                                                                                                                                                                                                                                                                                                                         | Results                                                                                                                                                                                                                                                                                                                                                                                                                                                                                                                                                                                        |
|-------|-------------------------------|-----------------------------------------------------------------------------------------------------------------------------------------------------------------------|----------------------------------------------------------------------|-------------------------------------------------------------------------------------------------------------------------------------------------------------------------------------------------------------------------------------------------------------------------------------------------------------------------------------------------|------------------------------------------------------------------------------------------------------------------------------------------------------------------------------------------------------------------------------------------------------------------------------------------------------------------------------------------------------------------------------------------------------------------------------------------------------------------------------------------------------------------------------------------------------------------------------------------------|
| 1.    | Gorrisen <i>et al.</i> (2018) | <i>in vitro</i> ; CD14 <sup>+</sup> monocytes from human peripheral blood mononuclear cells (PBMCs) were cultured with M-CSF and RANKL supplementation.               | 5% O <sub>2</sub> throughout the experiment (24 h, 1, 2 and 3 weeks) | <ul style="list-style-type: none"> <li>a. Osteoclasts were identified by TRAP staining.</li> <li>b. Resorption was measured through bisphosphonate fluorescence visualized with confocal microscopy.</li> <li>c. Gene expression of <i>CA II</i>, <i>ITGB3</i>, <i>TRAP</i>, <i>CatK</i> and <i>DCSTAMP</i> was measured by RT-qPCR.</li> </ul> | <ul style="list-style-type: none"> <li>a. Hypoxia reduced the intensity of TRAP positive osteoclasts..</li> <li>b. Hypoxia delayed TRAP-positive osteoclast formation.</li> <li>c. Hypoxia decreased mRNA levels of <i>CA II</i>, <i>ITGB3</i>, <i>TRAP</i>, <i>CatK</i> and <i>DCSTAMP</i>.</li> <li>d. Hypoxia increased single and double nucleated cells but not multinucleated.</li> <li>e. Total bone resorption capacity was not affected by hypoxia exposure over the 21 days.</li> <li>f. Hypoxia decreased senescence marker p21 and SA-<math>\beta</math>-gal expression</li> </ul> |
| 2.    | Murata <i>et al.</i> (2017)   | <i>in vitro</i> ; CD14 <sup>+</sup> monocytes from human peripheral blood mononuclear cells (PBMCs) were cultured with M-CSF and RANKL supplementation.               | 2% O <sub>2</sub> for 3 h before RANKL was added.                    | <ul style="list-style-type: none"> <li>a. Osteoclasts were identified by TRAP staining.</li> <li>b. Resorption was measured through the Osteo Assay Surface plate method.</li> <li>c. Gene expression of <i>ITGB3</i>, cathepsin K <i>CatK</i> and <i>CTR</i> was measured by RT-qPCR.</li> </ul>                                               | <ul style="list-style-type: none"> <li>a. Hypoxia increased the number of TRAP-positive osteoclasts.</li> <li>b. Resorption was higher in cultures under hypoxia</li> <li>c. Hypoxia decreased <i>ITGB3</i>, <i>CatK</i> and <i>CTR</i> expression</li> </ul>                                                                                                                                                                                                                                                                                                                                  |
| 3.    | Hulley <i>et al.</i> (2017)   | <i>in vitro</i> ; CD14 <sup>+</sup> monocytes of PBMCs from leukocyte cones (NHS Blood and Transplant) were cultured with M-CSF and RANKL supplementation for 9 days. | 2% O <sub>2</sub> for 24 h.                                          | <ul style="list-style-type: none"> <li>a. Osteoclasts were identified by TRAP staining.</li> <li>b. VNR-positive osteoclast was detected by immunocytochemistry.</li> <li>c. Resorption was measured through toluidine blue staining method.</li> </ul>                                                                                         | <ul style="list-style-type: none"> <li>a. Number of VNR-positive osteoclasts was not different between hypoxia and normoxia on day 2-3, 4-5, 6-7 and 8-9 of differentiation.</li> <li>b. Resorption was higher in cultures under hypoxia on day 4-5, 6-7 and 8-9 of differentiation.</li> </ul>                                                                                                                                                                                                                                                                                                |
| 4.    | Utting <i>et</i>              | <i>in vitro</i> ;                                                                                                                                                     | Hypoxia: 0.2-12%                                                     | a. Osteoclasts were identified by                                                                                                                                                                                                                                                                                                               | a. Hypoxia increased the osteoclast number                                                                                                                                                                                                                                                                                                                                                                                                                                                                                                                                                     |

|    |                              |                                                                                                                                                                     |                                                                                                                                                                                                                                                                                                                                                                                                     |                                                                                                                                                                                                                                                                                                                |                                                                                                                                                                                                                                                                                                                                                                                                                                                                                                                                                                                                                                                                                                                                                                                  |
|----|------------------------------|---------------------------------------------------------------------------------------------------------------------------------------------------------------------|-----------------------------------------------------------------------------------------------------------------------------------------------------------------------------------------------------------------------------------------------------------------------------------------------------------------------------------------------------------------------------------------------------|----------------------------------------------------------------------------------------------------------------------------------------------------------------------------------------------------------------------------------------------------------------------------------------------------------------|----------------------------------------------------------------------------------------------------------------------------------------------------------------------------------------------------------------------------------------------------------------------------------------------------------------------------------------------------------------------------------------------------------------------------------------------------------------------------------------------------------------------------------------------------------------------------------------------------------------------------------------------------------------------------------------------------------------------------------------------------------------------------------|
|    | <i>al.</i> (2010)            | Mononuclear cells were isolated from healthy male and female human PBMCs aged 20-50. The mononuclear cells obtained were cultured with M-CSF supplementation.       | O <sub>2</sub> for 10 days.                                                                                                                                                                                                                                                                                                                                                                         | TRAP staining.                                                                                                                                                                                                                                                                                                 | <ul style="list-style-type: none"> <li>b. Hypoxia increased the number of nuclei per osteoclast</li> <li>c. Resorption was higher <del>resorption-pit formation per osteoclast and total amount of resorption were higher in cells under</del> under hypoxia (2% O<sub>2</sub>).</li> </ul>                                                                                                                                                                                                                                                                                                                                                                                                                                                                                      |
| 5. | Knowles <i>et al.</i> (2009) | <i>in vitro</i> ;<br>Osteoclast-like giant cells of giant cell tumor of bone (GCTB) were isolated from tumor tissue and used as a model of mature human osteoclast. | Hypoxia: 8, 5, 2 and 0.1% O <sub>2</sub> for 24 h.                                                                                                                                                                                                                                                                                                                                                  | <ul style="list-style-type: none"> <li>a. Resorption area was visualized using toluidine blue staining.</li> <li>b. CTX-1 level in culture media was measured by ELISA.</li> <li>c. TRAP and CatK activities were measured by spectrometry.</li> <li>d. VNR was visualized by immunohistochemistry.</li> </ul> | <ul style="list-style-type: none"> <li>a. Resorption area was higher in cultures under 5 and 2% O<sub>2</sub>, while was lower in 0.1% O<sub>2</sub> compared to normoxia.</li> </ul>                                                                                                                                                                                                                                                                                                                                                                                                                                                                                                                                                                                            |
|    |                              | <i>in vitro</i> ;<br>Mononuclear cells derived from PBMCs were cultured with M-CSF and RANKL supplementation.                                                       | Hypoxia: 8, 5, 2 and 0.1% O <sub>2</sub> for 24 or 72 h. <ul style="list-style-type: none"> <li>a. 24 h 2% O<sub>2</sub></li> <li>b. 24 h 2% O<sub>2</sub> + 24 h normoxia</li> <li>c. 72 h hx/rx (reoxygenation) : 3X of 1 h normoxia + 23 h 2% O<sub>2</sub></li> <li>d. 7 days: 2% O<sub>2</sub> on days 14-21</li> <li>e. 21 days hx/rx: 21X of 1 h normoxia + 23 h 2% O<sub>2</sub></li> </ul> |                                                                                                                                                                                                                                                                                                                | <ul style="list-style-type: none"> <li>a. Resorption area and TRAP activity were higher in cultures under 5 and 2% O<sub>2</sub> for 24 h.</li> <li>b. The mRNA level of CTX-1 release in media and CatK was higher in 2% O<sub>2</sub> for 24 h.</li> <li>c. Number of VNR-positive cells was higher in cultures under 8% O<sub>2</sub>, while was lower in cultures under 2 and 0.1% O<sub>2</sub> for both 24 and 72 h.</li> <li>b. Number of toluidine blue-positive cells was lower in cultures under 0.1% O<sub>2</sub> for 24 h, 2 and 0.1% O<sub>2</sub> for 72 h.</li> <li>a. Number of toluidine blue-positive cells was lower in cultures under 2% O<sub>2</sub> on days 14-21, while cell number was not different between other conditions and normoxia.</li> </ul> |

|    |                                    |                                                                                                                                                     |                                                               |                                                                                                                                                                                                                                               |                                                                                                                                                                                                                                                                                                                                                                                                                                                                                                                                                                 |
|----|------------------------------------|-----------------------------------------------------------------------------------------------------------------------------------------------------|---------------------------------------------------------------|-----------------------------------------------------------------------------------------------------------------------------------------------------------------------------------------------------------------------------------------------|-----------------------------------------------------------------------------------------------------------------------------------------------------------------------------------------------------------------------------------------------------------------------------------------------------------------------------------------------------------------------------------------------------------------------------------------------------------------------------------------------------------------------------------------------------------------|
| 6. | Muzylak<br><i>et al.</i><br>(2006) | <i>in vitro</i> ;<br>PBMCs isolated from<br>healthy feline blood of 2<br>years old. Cells were<br>cultured with M-CSF and<br>RANKL supplementation. | Hypoxia: 12 or 2%<br>O <sub>2</sub> on days 1-14 or<br>11-14. | <ul style="list-style-type: none"> <li>a. Osteoclasts were identified by TRAP staining.</li> <li>b. Resorption was visualized by biotin-conjugated wheat germ agglutination lectin staining after reacted with TRITC-streptavidin.</li> </ul> | <ul style="list-style-type: none"> <li>a. Hypoxia lowered the number of TRAP-positive osteoclasts when exposed to 12 and 2% O<sub>2</sub>,</li> <li>b. The size of each osteoclast was bigger in 2% O<sub>2</sub> compared to 20% O<sub>2</sub> exposure on days 1-14.</li> <li>c. The size of TRAP-positive osteoclasts was bigger while their number remained unchanged in cultures exposed to 2% O<sub>2</sub> on 11-14 days.</li> <li>d. Resorption percentage was higher in cultures exposed to 12 and 2% O<sub>2</sub> on days 1-14 and 11-14.</li> </ul> |
|----|------------------------------------|-----------------------------------------------------------------------------------------------------------------------------------------------------|---------------------------------------------------------------|-----------------------------------------------------------------------------------------------------------------------------------------------------------------------------------------------------------------------------------------------|-----------------------------------------------------------------------------------------------------------------------------------------------------------------------------------------------------------------------------------------------------------------------------------------------------------------------------------------------------------------------------------------------------------------------------------------------------------------------------------------------------------------------------------------------------------------|

Note: Normoxia or reoxygenation (rx): 20-21% O<sub>2</sub>. Abbreviations: Oxygen (O<sub>2</sub>), Quantitative reverse transcriptase polymerase chain reaction (RT-qPCR), messenger RNA (mRNA), Tetramethylrhodamine (TRITC), Enzyme linked immunosorbent assay (ELISA), Tartrate-resistant acid phosphatase (TRAP), Carbonic anhydrase II (CA II), Integrin subunit beta-3 (ITGB3), Cathepsin K (CatK) and Dendritic cell-specific transmembrane protein (DCSTAMP), Calcitonin receptor (CTR), Vitronectin receptor (VNR) & hypoxia (hx).
